# Supplementary material for: The Tiny Drosophila Melanogaster for the Biggest Answers in Huntington’s Disease
Source: PubMed Central journal article supplement (PMC6121572; doi:10.3390/ijms19082398), 2018-08-14
Supplement: ijms-19-02398-s001.pdf [file ijms-19-02398-s001.pdf]

Drosophila LLLTDQQ---ANSVLGALGLLRLLLPQLIRGYPGDSHEDSESLAGKKQQQQQTTSDCRQ 284  
 Takifugu LLVPVDEEHHSHLILGVLLTLRYLMLPLLQQQVNTISLKGSGFVMOKE----ADVQPAPEQ 298  
 Danio LVVPVDEEHHSHLILGVLLTLRYLMLPLIQQQTPSTSLKGSGFLVRKE----ADVTPAPEQ 298  
 Bos LLVPVDEEHPTELLILGVLLALRYLVPLLQQQVKDTSKGSFGVTRKE----MEVSPSTEQ 339  
 Homo LLVPVDEEHSTLLILGVLLTLRYLVPLLQQQVKDTSKGSFGVTRKE----MEVSPSAEQ 353  
 Rattus LLVPMEEHDPTLLILGVLLTLRCLVPLLQQQVKDTSKGSFGVTRKE----MEVSPSAEQ 332  
 Mus LLVPMEEHSTLLILGVLLTLRCLVPLLQQQVKDTSKGSFGVTRKE----MEVSPSTEQ 332  
 \*:: : : \*\*.\* \*\* \*:\* : : \* :.\* : : \* . \*

Drosophila IIEIYDYCLHLLSTQHTANHAIINATLEVINILQAVDAASDGQCSQSLGQSLRQLLCNQ 344  
 Takifugu LLOVYELTLHYTQH---WDHNVVTAALELLOQLRTPPPE-----LLHVLITAG 344  
 Danio LIQVYELTLHYTQH---WDHNVVTALELLOQMFRTPPPE-----LLNVLITRG 344  
 Bos LVQVYELTLHYTQH---QDHNVVTALELLOQLRTPPPE-----LLRVLTTAG 385  
 Homo LVQVYELTLHHTQH---QDHNVVTALELLOQLRTPPPE-----LLQTLTAVG 399  
 Rattus LVQVYELTLHHTQH---QDHNVVTALELLOQLRTPPPE-----LLQALTTPG 378  
 Mus LVQVYELTLHHTQH---QDHNVVTALELLOQLRTPPPE-----LLQALTTPG 378  
 :::\*: \*\* . :\* :.:\*\*::: ::: :\* . \*

Drosophila QLOHNEYLRKRKSLKNQIFQLKNYEVATSQHQLEDEDEDVDELVVGATAMQM--KKN 401  
 Takifugu SIQHASFV-----RQDIERSRSGSILELIAGGGSTCSPLLHRK 383  
 Danio KITHTSVF-----REEMESRARSISILELIAG-GSTCSPLLLRK 382  
 Bos GVRQLAAS-----KDEPGGRSRSGSIVELIAGGGSSCSPVLSRK 424  
 Homo GIGQLTAA-----KEESGGRSRSGSIVELIAGGGSSCSPVLSRK 438  
 Rattus GLGQLTLV-----REEAGGRSRSGSIVELLAGGGSSCSPVLSRK 417  
 Mus GLGQLTLV-----QEEARGRGRSGSIVELLAGGGSSCSPVLSRK 417  
 : : ::: . . . : \*\*.\* : :

Drosophila SNAKLQQAKCREQQQHQQQLEVDNSSLGINAGEDAPTEAPSS--VADEGGPEST-K 457  
 Takifugu HRGKMLSGEE-DALEDDPEKT-DVTTGYFTAVGADN-----SSA 420  
 Danio QKGKLLSGEE-EGLEDDPER-AEVTTGSFTASVGGDSSSEAP-SSSGVSSL----- 430  
 Bos QKGKVLFGEE-APLEDDSEPRSEGSPPAFSASVKGEVGGELAAS-SGISTPGSASSAADS 482  
 Homo QKGKVLGEE-EALEDDSESRSDVSSSALTASVKDEISGELAA-SSGVSTPG-----S 489  
 Rattus QKGKVLGEE-EALEDDSESRSDVSSSFAAASVKSEIGGELAASSSGVSTPG-----S 469  
 Mus QKGKVLGEE-EALEDDSESRSDVSSSFAAASVKSEIGGELAA-SSGVSTPG-----S 468  
 ..\*: : : : : : :

Drosophila LR-CHIRNAARISSECVASDEDKQGQGHRRQRDEDGVVAEDDDDDDDDDDDMELLS 516  
 Takifugu AQVDIITQQPRSSQHTIQPGDSVDLSASSEQGRGGASASD--TPESPNDDEEDMLRS 477  
 Danio GTSDIITEQPRSSQHALQPGDSVDLSASEQGVGPD-----TPDEEDEDMLRS 479  
 Bos VGHDIITEQPRSQH-TLQ-TDAVDLAACDLTS-----AATDGDEEDILSHS 526  
 Homo AGHDIITEQPRSQH-TLQ-ADSVDLASCDLTS-----SATDGDEEDILSHS 533  
 Rattus VGHDIITEQPRSQH-TLQ-ADSVDLSGCDLTS-----AATDGDEEDILSHS 513  
 Mus VGHDIITEQPRSQH-TLQ-ADSVDLSGCDLTS-----AATDGDEEDILSHS 512  
 \* : \*\* : : : : \*::\*: \*

Drosophila AECDDFTTSLSQLNEQQQALS AALKLPTTTAASSGGAA TSQDDKLI DV DADVGGLPKPQH 576  
 Takifugu SSCGAN-----ITPETVE---DAT--PENPAQEGRPVGGSGAYDHS 513  
 Danio SSGGAG-----LVSTSGD---LVT--DANQMS-----AGAVSS 507  
 Bos SSQMSA-----VPS-----D--PAMD LN-----DGTQAS 548  
 Homo SSQVSA-----VPS-----D--PAMD LN-----DGTQAS 555  
 Rattus SSQFSA-----VPS-----D--PAMD LN-----DGTQAS 535  
 Mus SSQFSA-----VPS-----D--PAMD LN-----DGTQAS 534

```

      . . . . .
Drosophila  SS---LQNLLAGSDDKSQLSDIDNESFN SIDFDAEIT IAGSK EQQQQHPPADDSV ESG 632
Takifugu    LPPSDSSQT TTEGPDSA-----VTPSDVAELVLDGSESQYSG----- 550
Danio       SPPSESSQT TTEGPDSA-----VTPSDCAELVLDGSESQYSG----- 544
Bos         SPIDSSQT TTEGPDSA-----VTPSDSSEIVLDGTD SQYPG----- 585
Homo        SPIDSSQT TTEGPDSA-----VTPSDSSEIVLDGTDN QYLG----- 592
Rattus      SPIDSSQT TTEGPDSA-----VTPSDSSEIVLDGAD SQYLG----- 572
Mus         SPIDSSQT TTEGPDSA-----VTPSDSSEIVLDGAD SQYLG----- 571
          * . * * . : . : * : . : * : . *

```

```

Drosophila  DATAIGTFFNLLSHSNAASESVSKLFRQSSGSKSTPSK SASTPAPADKSDAISAA SLTL 692
Takifugu    --MQIGTLQ-----DEEDEGTATSSQEDPPDPFLRSAL-- 581
Danio       --MQIGTLQ-----DEEE-EGSAPPPDKPPEPFSQSAL-- 574
Bos         --MQVGQTQ-----DEDE-DATAVLPDEDAETFRNSSIDF 617
Homo        --LQIGQPQ-----DEDE-EATGILPDEASEAFRNSSM-- 622
Rattus      --VQIGQPQ-----EEDEEEAAGVLSGEVSDVFRNSSL-- 603
Mus         --MQIGQPQ-----EDDEEGAAGVLSGEVSDVFRNSSL-- 602
          : * . . : . : : : :

```

```

Drosophila  SLTSLASSNLEPPERQPLIAETPTPVEDSCSITASHTASTALMMDAPAVEVAASKPETPQ 752
Takifugu    ---ALSKPH-----LF-ES---RGHNRQGS-DS-----SVDRFIPKDE-PP 613
Danio       ---ALSKPH-----LL-EG---KGHNRQSS-DS-----SVDRFIPKEE-VL 606
Bos         E--ALQQA H-----LL-KS---MGHCRQSS-DS-----SVDKFVSR EE-AA 650
Homo        ---ALQQA H-----LL-KN---MSHCRQPS-DS-----SVDKFVLRDE-AT 654
Rattus      ---ALQQA H-----LL-ER---MGHSRQPS-DS-----SVDKFVSKDE-VA 635
Mus         ---ALQQA H-----LL-ER---MGHSRQPS-DS-----SIDKYVTRDE-VA 634
          : * . : * : . : : : : *

```

```

Drosophila  LRGTPNANPFLVENSPLRQT VVGRALITVKIGSIL--EQSLVYYTARLVAARFLLSGQAA 810
Takifugu    EP-EP-----DNKMSR-----IKGAIGHYTD RGAEPVVHCVRLLSASFLLTGQKN 657
Danio       EPAEL-----DNKPSR-----IKGDIGHYTD PKEEPLMHCVRLLAASFLLTGQRN 651
Bos         EPGDP-----ENKPCR-----VKGDIGQSTDEDSAPLVHCVRLLSASFLLTGEKN 695
Homo        EPGDQ-----ENKPCR-----IKGDIGQSTDDDSAPLVHCVRLLSASFLLTG GKN 699
Rattus      EAGDP-----ESKPCR-----IKGDIGQPNDDDSAPLVHCVRLLSASFLLTGEKK 680
Mus         EASDP-----ESKPCR-----IKGDIGQPNDDDSAPLVHCVRLLSASFLLTGEKK 679
          : . . * : . ** : : . * : : * * * : *

```

```

Drosophila  GLQPD SISRVSIKSLSLAVIAQCVR LAPKILQLSLEISEQELQLLEEATSQIGSGDSTQV 870
Takifugu    GLTPDRDVRVSVKALAVSCV GAAAALHPEAFFNSLYLEPLDG----- 699
Danio       GLVPDNEVRVSVKALAVSCV GAAAALLPEAFFNLLYLQPLDG----- 693
Bos         ALVPDRDVRVSVKALALSCIGAAVALHPESFFSKLYRAPLDT----- 737
Homo        VLVPDRDVRVSVKALALSCIGAAVALHPESFFSKLYKVPLDT----- 741
Rattus      ALVPDRDVRVSVKALALSCIGAAVALHPESFFSKLYKVPLST----- 722
Mus         ALVPDRDVRVSVKALALSCIGAAVALHPESFFSRLYKVPLNT----- 721
          * ** * * * : * : : : . . * * : : * .

```

```

Drosophila  SSPQSSDNSQVGGEKPPLDSSLVPTSL EENLLLLLDIKDDHFGPSTCPAYLQSATPTLSRS 930
Takifugu    ----- 699
Danio       ----- 693
Bos         ----- 737
Homo        ----- 741

```

|            |                                                               |     |
|------------|---------------------------------------------------------------|-----|
| Rattus     | -----                                                         | 722 |
| Mus        | -----                                                         | 721 |
|            |                                                               |     |
| Drosophila | ADASVLLLEGGTTSSRSAKKSEEMLSKSEIIIESSYRPTVAVEDVPPLSMPPRPPKRTKST | 990 |
| Takifugu   | -----                                                         | 699 |
| Danio      | -----                                                         | 693 |
| Bos        | -----                                                         | 737 |
| Homo       | -----                                                         | 741 |
| Rattus     | -----                                                         | 722 |
| Mus        | -----                                                         | 721 |

|            |                                                             |      |
|------------|-------------------------------------------------------------|------|
| Drosophila | RSRVGLGTSSTTESSSPQSRQKLSDILLFHDHCDPILRGGVQOVVGNFLQSSGAGLFLD | 1050 |
| Takifugu   | -----LRAEEQQYISDVLGFIDHGDQPVRGATAILCAAIQAALSKMRYN           | 744  |
| Danio      | -----QOTEQQYISDILQYIEHGDHQIRGATAILCGALIQAIQLKTRYN           | 738  |
| Bos        | -----VEYPEEQYVSDVLNYVDHGDQPVRGATAILCGTLCISVLGRCRFH          | 782  |
| Homo       | -----TEYPEEQYVSDILNYIDHGDQPVRGATAILCGTLCISILSRRFH           | 786  |
| Rattus     | -----MESTEEQYVSDILNYIDHGDQPVRGATAILCGTLVYSILSRRLR           | 767  |
| Mus        | -----TESTEEQYVSDILNYIDHGDQPVRGATAILCGTLVYSILSRRLR           | 766  |
|            | ..* :***:* : :* * :**.. : . :: :                            |      |

|            |                                                            |      |
|------------|------------------------------------------------------------|------|
| Drosophila | LQRGLGLQHLLAILLKGFEDIHTVVIQALNAFDKIFPNVVKYLTEPPCHYHAHQOQQO | 1110 |
| Takifugu   | IHSWL-----ASVQSK-----                                      | 755  |
| Danio      | TETWL-----SQIQSV-----                                      | 749  |
| Bos        | VAGWM-----GAVRAR-----                                      | 793  |
| Homo       | VGDWM-----GTIRTL-----                                      | 797  |
| Rattus     | VGDWL-----GTIRAL-----                                      | 778  |
| Mus        | VGDWL-----GNIRTL-----                                      | 777  |
|            | :                   :::                                    |      |

|            |                                                             |      |
|------------|-------------------------------------------------------------|------|
| Drosophila | QQKEQQQQEQDNQKLEQDLQRHSSGQQKRSQAQTFGQQTFAKDQDNALSSQRQQQRRPN | 1170 |
| Takifugu   | -----TGN--PLSLVDLVP LL-----QKALKDE                          | 776  |
| Danio      | -----TGS--SVTLENFVPLL-----QRS LKDE                          | 770  |
| Bos        | -----TGN--TFSLADCIP LL-----QKTLKDE                          | 814  |
| Homo       | -----TGN--TFSLADCIP LL-----RKTLKDE                          | 818  |
| Rattus     | -----TGN--TFSLVDCIP LL-----QKTLKDE                          | 799  |
| Mus        | -----TGN--TFSLVDCIP LL-----QKTLKDE                          | 798  |
|            | :* .                   :: : :                               |      |

|            |                                                              |      |
|------------|--------------------------------------------------------------|------|
| Drosophila | DAGTCANSSATDNDELLAALLNDFQLQSTGMRQQPKNNSTDTGQSGNEPDLEPNPNAAVE | 1230 |
| Takifugu   | SSVTCKMACSAVR-----HCIM                                       | 793  |
| Danio      | SSVTCKMACAAVR-----HCIM                                       | 787  |
| Bos        | SSVTCKLACAAVR-----LCVM                                       | 831  |
| Homo       | SSVTCKLACTAVR-----NCVM                                       | 835  |
| Rattus     | SSVTCKLACTAVR-----HCVL                                       | 816  |
| Mus        | SSVTCKLACTAVR-----HCVL                                       | 815  |
|            | .. **   : : : .                   . :                        |      |

|            |                                                                |      |
|------------|----------------------------------------------------------------|------|
| Drosophila | PFCVFAIS--PKLLLSKLR LCHHNKYWLQNKYAEVISNLNYVLLRSYYANFRCAIDNKN   | 1288 |
| Takifugu   | SLCGSTLSELGLRLVVDL FALKDSSYWLVRTELLETLAEMDFRLVNFLE RKS----EALH | 849  |
| Danio      | ALCNGSLSELGLQLLIDL LTLKNSYWLVRTELLETLAEIDFRLISFLERKT----EKLH   | 843  |

|            |                                                                |      |      |
|------------|----------------------------------------------------------------|------|------|
| Bos        | SLCSSSYSAWGLQLITNLLALRSSSYWLVRTLELTVAEIDFRLVSFLEAKA----        | ESLH | 887  |
| Homo       | SLCSSSYSELGLQLIIDVLTLRNSSYWLVRTLELTLAEIDFRLVSFLEAKA----        | ENLH | 891  |
| Rattus     | SLCSSSYDLGLQLLIDMLPLKNSSYWLVRTLELTLAEIDFRLVSFLEAKA----         | ESLH | 872  |
| Mus        | SLCSSSYDLGLQLLIDMLPLKNSSYWLVRTLELTLAEIDFRLVSFLEAKA----         | ESLH | 871  |
|            | : * : * : * : : : . * * * * : : : : : : * : : :                |      |      |
| Drosophila | SGARKQDSKWPPMDASSVCHSVRDAEGEDIVCTYEAFQFLAELLHLLGDDDDARVREHAACC |      | 1348 |
| Takifugu   | KGE---HHY-----TGRLRLQERVLNDVVIQLLGDDDDPRVRHVAASA               |      | 888  |
| Danio      | KGE---HHY-----TGLLRLQERVLNDVVLYLLGDEDPRVRHVAANT                |      | 882  |
| Bos        | RGA---HHY-----TGLLKLQERVLNSVVIHLLGDEDPRVRHVAAS                 |      | 926  |
| Homo       | RGA---HHY-----TGLLKLQERVLNNVVIHLLGDEDPRVRHVAAS                 |      | 930  |
| Rattus     | RGA---HHY-----TGFLKLQERVLNNVVIYLLGDEDPRVRHVAATT                |      | 911  |
| Mus        | RGA---HHY-----TGFLKLQERVLNNVVIYLLGDEDPRVRHVAATS                |      | 910  |
|            | * : : : : : : : : : : * * * * : * * * . * *                    |      |      |
| Drosophila | LCRFIMQTARQDPSQDQAGGGGGDDIEGNGNVN-----ETQQ-TNFNLL---WDFFDY     |      | 1399 |
| Takifugu   | VSRLVSRLLFFD---CDQGGADPVVAIARDQSSVYLQLLMHETQPPSOLTVSTITRTYRGF  |      | 945  |
| Danio      | IGRLVPRLLFFD---CDQGGTDPVVAIARDQSSVHLQLLMHETQPPSQFTVSTITRTYRGF  |      | 939  |
| Bos        | LMRLVPKLFYK---CDQGGADPVVAIARDQSSVYLQLLMHETQPPSHFSVSAVTRIYRGY   |      | 983  |
| Homo       | LIRLVPKLFYK---CDQGGADPVVAIARDQSSVYLQLLMHETQPPSHFSVSTITRIYRGY   |      | 987  |
| Rattus     | LTRLVPKLFYK---CDQGGADPVVAIARDQSSVYLQLLMHETQPPSHFSVSTITRIYRGY   |      | 968  |
| Mus        | LTRLVPKLFYK---CDQGGADPVVAIARDQSSVYLQLLMHETQPPSHFSVSTITRIYRGY   |      | 967  |
|            | : * : : : . * * * . . . . * : * * * : : : : : : :              |      |      |
| Drosophila | RIFGSM-SVTLRNL-FRASSTIVPPLAELDALATSNSAPSYDPTGSTSGSSTSTSASSGG   |      | 1457 |
| Takifugu   | NLSNNVADVTVENNLSRVVTAVSHA-----F-----TSSTS RALTFGC              |      | 983  |
| Danio      | NLCQSAPDVTVENNLSRVITAI SHA-----L-----TSSTS RAMTFGC             |      | 977  |
| Bos        | NLLPSITDVTLENNLSRVIAAVSHE-----L-----ITSTTRALTFGC               |      | 1021 |
| Homo       | NLLPSITDVTMENNLSRVIAAVSHE-----L-----ITSTTRALTFGC               |      | 1025 |
| Rattus     | SLLPSVTDVTMENNLSRVVAAVSHE-----L-----ITSTTRALTFGC               |      | 1006 |
| Mus        | SLLPSITDVTMENNLSRVVAAVSHE-----L-----ITSTTRALTFGC               |      | 1005 |
|            | : . * * : * * . : : : : : * * * : : : *                        |      |      |
| Drosophila | SAAVSAASAYFEASYGIGIA-----EGHVFALASASQRQIAQEEK                  |      | 1498 |
| Takifugu   | CEALCLLAVHFPICWTWTGWHCGHISSQSSFSS--RVGRSRGRTL SVS QSGSTPASST-- |      | 1039 |
| Danio      | CEALCLLSSTFPVCNWSGTGWHCGFVSSSVFHLNRSSQYRSRGRSFSLSQSGS-----     |      | 1029 |
| Bos        | CEALCLLSTAFPVCIWSLGWHCGVPPLS-----A-----                        |      | 1050 |
| Homo       | CEALCLLSTAFPVCIWSLGWHCGVPPLS-----A-----                        |      | 1054 |
| Rattus     | CEALCVLSAAFPVCTWSLGWHCGVPPLS-----A-----                        |      | 1035 |
| Mus        | CEALCLLSAAFPVCTWSLGWHCGVPPLS-----A-----                        |      | 1034 |
|            | . * : : . : *                                                  |      |      |
| Drosophila | VLAKVLYRLTNKMLTNDKNVQFGI IYALRLLL RHFNVDYQQVWLEFNFVE-----      |      | 1550 |
| Takifugu   | -----TSSAVDPERRTLVGTANMV-----LSLLSSAWFPLDLSAHQDALLLC           |      | 1082 |
| Danio      | -----NEEVRRSLTVGVASMV-----LSLISSAWFPLDLSAHQAALLLA              |      | 1068 |
| Bos        | -----SDESRSKCTVGMVSMI-----LTLSSAWFPLDLSAHQDALILA               |      | 1089 |
| Homo       | -----SDESRSKCTVGMATMI-----LTLSSAWFPLDLSAHQDALILA               |      | 1093 |
| Rattus     | -----SDESRSKCTVGMASMI-----LTLSSAWFPLDLSAHQDALILA               |      | 1074 |
| Mus        | -----SDESRSKCTVGMASMI-----LTLSSAWFPLDLSAHQDALILA               |      | 1073 |
|            | : . * : : : . . * : : : *                                      |      |      |
| Drosophila | -----ICISYAYYNN A--TAA---DLGCQNDLIDVMGKLMAGAMLSGEPNTAHL D      |      | 1596 |

Takifugu GNLLAAVAPKCLRNPWAGEDDSSSSSTNTSGGTHKMEEPWAAL-----SDRAFVAMVE 1135  
 Danio GNLLAAVAPKCMKSPWAGEESSPA-----SSKVEEPWPAL-----NDRSLVVMVE 1114  
 Bos GNLLAASAPKSLRSSWASEDEASTA-----ATKQEEAWPAL-----GDRTLVPMVE 1135  
 Homo GNLLAASAPKSLRSSWASEEENPA-----ATKQEEVWPAL-----GDRALVPMVE 1139  
 Rattus GNLLAASAPKSLRSSWASEEEGSSA-----ATRQEEIWPAL-----GDRTLVPMVE 1120  
 Mus GNLLAASAPKSLRSSWTSEEEANSA-----ATRQEEIWPAL-----GDRTLVPLVE 1119

. : : . : : \* . . . . : :

Drosophila FLLRHSVKMLNIYYHLVTNQRPPTAGSQ----- 1624  
 Takifugu QLFSHLLKVLNICAHVLDLDDTPPGPPVKATLPSLTNTPSLSPIRRKGKDKDAVDSSSAPLS 1195  
 Danio QLFSHLLKILNICAHVLDLDDTPPGPAVKASLPSLANTPSLSPIRRKGKDKMMEAGTTPMS 1174  
 Bos QLFSHLLKVINICAHVLDLDDVAPGPAVKAALPSLTNPPSLSPIRRKGKKEPGEQASVPVS 1195  
 Homo QLFSHLLKVINICAHVLDLDDVAPGPAVKAALPSLTNPPSLSPIRRKGKKEPGEQASVPLS 1199  
 Rattus QLFSHLLKVINICAHVLDLDDVTPGPAVKAALPSLTNPPSLSPIRRKGKKEPGEQSTPMS 1180  
 Mus QLFSHLLKVINICAHVLDLDDVTPGPAVKAALPSLTNPPSLSPIRRKGKKEPGEQASTPMS 1179

\* : \* : \* : \* \* \* : : \* .

Drosophila --SGSSSSKQPKSELFAREQPAATLQALGYFAGDYVYMKLYNILRGANDSYKITINQEAG 1682  
 Takifugu PKKGNEANTG-RPTESTGSTAVHKSTTLGSFYHLPYLYKLYDVLKATHANFKVMDLHNS 1254  
 Danio PKKGGFTNTG-RAADSTATAAVNKSTTLGSFYHLPYLYKLYDALRATHANYKVTLDLHNP 1233  
 Bos PKKGSSEASPASRPPESTSGPVATNKSSSLGSFCHLPSYKLDHDLKATHANYKVTLDLQSS 1255  
 Homo PKKGSSEASAASRQSDTSGPVTTKSSSLGSFYHLPYLYKLDHDLKATHANYKVTLDLQNS 1259  
 Rattus PKKGGFASTASRQSDTSGPVTASKSSSLGSFYHLPYLYRLHDLKATHANYKVTLDLQNS 1240  
 Mus PKKVGESASAASRQSDTSGPVTASKSSSLGSFYHLPYLYKLDHDLKATHANYKVTLDLQNS 1239

. . . . : : . . : \* \* \* : \* : \* : \* : \* : \* : \* : \* .

Drosophila SL-LICLLKTCLHAVSLCLEGMASAPPELKLIEILHYLTRLINYPAEVCVACLRQLLK 1741  
 Takifugu QEKFGSFLRAALDVLSQLLELA--TLNDINKVEEILGYLKSCFSREPTMATVCVQQLLK 1312  
 Danio NEKFGGFLRSALDVLSQLLELA--TLHDIGKVEEILGYLKSCFSREPTMATVCVQQLLK 1291  
 Bos GEKFGGFLRSALDVLSQLLELA--TLQDIGKVEEILGYLKSCFSREPTMATVCVQQLLK 1313  
 Homo TEKFGGFLRSALDVLSQLLELA--TLQDIGKVEEILGYLKSCFSREPTMATVCVQQLLK 1317  
 Rattus TEKFGGFLRSALDVLSQLLELA--TLQDIGKVEEVLGYLKSCFSREPTMATVCVQQLLK 1298  
 Mus TEKFGGFLRSALDVLSQLLELA--TLQDIGKVEEVLGYLKSCFSREPTMATVCVQQLLK 1297

: : \* : \* . \* . . \* \* : \* : \* : \* \* \* . : \* . . . \* : \* \* \* \*

Drosophila YLFAQNYASQVRLQ--PSAIGGNGSEIG-----HHAAFMRPYFAAKGRGHGASSTL 1790  
 Takifugu TLFGTNLSAQYEGFLSGPSRSQKALRLGSSSLRPGLYHYCFMAPYTHFTQALADA---- 1368  
 Danio ALFGTNSAQYEGASSNPCRQKALRLGSSSVRPGLYHYCFMAPYTHFTQALADA---- 1347  
 Bos TLFGTNLSAQDGLSSSHASKSQGRAQLGSSSVRPGLYHYCFMAPYTHFTQALADA---- 1369  
 Homo TLFGTNLSAQFDGLSSNPSKSQGRAQLGSSSVRPGLYHYCFMAPYTHFTQALADA---- 1373  
 Rattus TLFGTNLSAQFDGLSSNPSKSQGRAQLGSSSVRPGLYHYCFMAPYTHFTQALADA---- 1354  
 Mus TLFGTNLSAQFDGLSSNPSKSQGRAQLGSSSVRPGLYHYCFMAPYTHFTQALADA---- 1353

\*\* . \* \*\*\* . . . : \* : \* . \* \* \* . \* . \*

Drosophila LPTINSKPAVAVGSQRGAPTARQPIDA-GP--LQDMGMLFVHGLQPP--TPPAGDCV 1843  
 Takifugu -----SLRNMVQ-AEHEQDTSQWFDVMQKTSNQLRSNIANAARHRGDKNAIH 1414  
 Danio -----SLRNMVQ-AEQEQDASQWFDVMQKVSQQLRSSITNVTNRHRGDKNAIH 1393  
 Bos -----SLRNAAQ-AEQDQDTAGWFDVLOKVSTQLKTNLTSVTKNRADKNAIH 1415  
 Homo -----SLRNMVQ-AEQENDTSQWFDVLOKVSTQLKTNLTSVTKNRADKNAIH 1419  
 Rattus -----SLRNMVQ-ADQEHASQWFDVLOKVSAQLKTNLTSVTKNRADKNAIH 1400  
 Mus -----SLRNMVQ-AEQERDASQWFDVLOKVSAQLKTNLTSVTKNRADKNAIH 1399

\* \* . \* : \* : \* : \* . . : . :

Drosophila RLIKLFEPMVIYCLTLFMKSNA-LVQAPILRLLSQLLDLNVYTSILDSKNVIFDQVLSNM 1902  
 Takifugu NHIRLFEPLVIKALKQYTTSTSVLQROVLDLLAQLVQLRVNYCLLSDQVFIGFVLKQF 1474  
 Danio NHIRLFEPLVIKALKQYTTSTSVLQROVLDLLAQLVQLRVNYCLLSDQVFIGFVLKQF 1453  
 Bos NHIRLFEPLVIKALKQYTTTTSVQLQKQVLDLLAQLVQLRVNYCLLSDQVFIGFVLKQF 1475  
 Homo NHIRLFEPLVIKALKQYTTTTCVQLQKQVLDLLAQLVQLRVNYCLLSDQVFIGFVLKQF 1479  
 Rattus NHIRLFEPLVIKALKQYTTTTSVQLQKQVLDLLAQLVQLRVNYCLLSDQVFIGFVLKQF 1460  
 Mus NHIRLFEPLVIKALKQYTTTTSVQLQKQVLDLLAQLVQLRVNYCLLSDQVFIGFVLKQF 1459  
 . \* : \* \* \* \* : \* \* . \* . : . : . . : \* : \* \* : \* \* : \* . \* . : \* \* \* . : \* : . . \* \* : :

Drosophila DLIEGGIDRNAFIMVPPMLRFLVQLT--HKSDRQLITIPKIIISITNLLANGSVRVVA-L 1959  
 Takifugu EYIEVGQFRDSEAIIPNIFFFLVLLSYERYHSKQIISIPKIIQLCDGIMASGRKAVTHAI 1534  
 Danio EYIEVGQFRDSEAIIPNIFFFLVLLSYERYHSKQIISIPKIIQLCDGIMASGRKAVTHAI 1513  
 Bos EYIEVGQFRDSEAIIPNIFFFLVLLSYERYHSKQIIGIPKIIQLCDGIMASGRKAVTHAI 1535  
 Homo EYIEVGQFRDSEAIIPNIFFFLVLLSYERYHSKQIIGIPKIIQLCDGIMASGRKAVTHAI 1539  
 Rattus EYIEVGQFRDSEAIIPNIFFFLVLLSYERYHSKQIIGIPKIIQLCDGIMASGRKAVTHAI 1520  
 Mus EYIEVGQFRDSEAIIPNIFFFLVLLSYERYHSKQIIGIPKIIQLCDGIMASGRKAVTHAI 1519  
 : \* \* \* \* : \* : : \* \* : \* : : . : \* : \* \* \* \* . : : . : \* . \* . : :

Drosophila LALKTLSYELFFMHSQLEALDTEGHNSGRDACQSPLSAAPTPEALREALLAQRRELDTOR 2019  
 Takifugu PALQPIVHDLFVLRGSN-----KADAGKELETQK 1563  
 Danio PALQPIVHDLFVLRGSN-----KADAGKELETQK 1542  
 Bos PALQPIVHDLFVLRGTN-----KADAGKELETQK 1564  
 Homo PALQPIVHDLFVLRGTN-----KADAGKELETQK 1568  
 Rattus PALQPIVHDLFVLRGTN-----KADAGKELETQK 1549  
 Mus PALQPIVHDLFVLRGTN-----KADAGKELETQK 1548  
 \*\* : : : \* \* . : . . : \* \* : \* \* :

Drosophila EVVLGMLKFIARPSQOVLALLLLFERSVQQLDTPPYR--SAQDADAVYGTLCRGLCSR 2077  
 Takifugu EVVVSMLLRLVQYHQV---LEMFILVLQOCHKENEDKWKRLSRQIADVILP---MIAKQ 1616  
 Danio EVVVSMLLRLIQHHQV---LEMFILVLQOCHKENEDKWKRLSRQVADIILP---MIGKQ 1595  
 Bos EVVVSMLLRLIQYHQV---LEMFITLVLQOCHKESDRWKRLSRQVADVILP---MLAKQ 1617  
 Homo EVVVSMLLRLIQYHQV---LEMFILVLQOCHKENEDKWKRLSRQIADIILP---MLAKQ 1621  
 Rattus EVVVSMLLRLIQYHQV---LEMFILVLQOCHKENEDKWKRLSRQVADIILP---MLAKQ 1602  
 Mus EVVVSMLLRLIQYHQV---LEMFILVLQOCHKENEDKWKRLSRQVADIILP---MLAKQ 1601  
 \* \* : . \* \* : : : : : \* : : \* . : . : : . : : \* \* \* \* : : : :

Drosophila QWRLHNAAGDLRLLLESCFRNNGNHVLADSKRFLQLLQLFIEQG-VGNF-----GDLAL 2128  
 Takifugu QMHLDSPEALGVLNLTLEFETVAPSSLRPVDMLL--KSMFPTPVTMASVATVQLWVSGILAV 1674  
 Danio QMHLDSHEALGVLNLTLEFESVAPSSLRPVDMLL--KSMFITPSTLASVGTVQLWVSGILAI 1653  
 Bos QMHIDSHEALGVLNLTLEFELAPSSLRPVDMLL--RSMFVTPDTLAAVSTVQLWVSGILAI 1675  
 Homo QMHIDSHEALGVLNLTLEFELAPSSLRPVDMLL--RSMFVTPNTMASVSTVQLWISGILAI 1679  
 Rattus QMHIDSHEALGVLNLTLEFELAPSSLRPVDMLL--RSMFITPSTMASVSTVQLWISGILAI 1660  
 Mus QMHIDSHEALGVLNLTLEFELAPSSLRPVDMLL--RSMFITPSTMASVSTVQLWISGILAI 1659  
 \* : : . . \* : \* : : \* . . \* . : \* : \* : : \* : : . . \* \* \* :

Drosophila AMVLSNVILKTEEIYLVNHI---KLYLKNNPTEARRLQALMPSSPSAAPHWQDEAPST 2184  
 Takifugu LRVLVS---QSTEDIVLSRIHELSSLPHLLSCHTIKRLQPNLSPSDQAGD----- 1723  
 Danio LRVLIS---QSTEDIILSRIQELSLSPYLLSCTPIRRLCDDVPPAPPE--TL----- 1700  
 Bos LRVLIS---QSTEDIVLSRIQELSFSPYLVSCPTISRRLRDLGDSSTAL----- 1719  
 Homo LRVLIS---QSTEDIVLSRIQELSFSPYLISCTVINRLRDLGDSSTL----- 1723  
 Rattus LRVLIS---QSTEDIVLSRIQELSFSPYLISCPVINRLRDLGDSNPTL----- 1704



|            |                                                                                                                         |      |
|------------|-------------------------------------------------------------------------------------------------------------------------|------|
| Mus        | LRVLLIS---QSTEDIVLCRIQELSFSPHLLSCLPVINRLRGGGGNVTL-----<br>*::* .**:* * . :* . . *                                       | 1703 |
| Drosophila | SSAAAAAARAAAASFSAGRSS-ISEINYFAKVLCEKLLACLE---VLLGLEP-SSSSHAY                                                            | 2238 |
| Takifugu   | -----GQONQEPNGEAKSLPEETFARFLIQLVGVLLDDISSRHVKVDITEQQHTFY                                                                | 1775 |
| Danio      | -----PVAMEDANGETTFRPPEETFARFLLQLVGVLLDDIANKQVKVDMSEQQHTFY                                                               | 1752 |
| Bos        | -----EEHTEGRQMKNLPEETFARFLLQLVGVLLLEDIVTKQLRVEVSEQQQTFY                                                                 | 1768 |
| Homo       | -----EEHSEGKQIKNLPEETFARFLLQLVGVLLLEDIVTKQLKQVEMSEQQHTFY                                                                | 1772 |
| Rattus     | -----GERSEGKQVKNLPEDTFSRFLQLVGVLLLEDIVTKQLKQVDMSEQQHTFY                                                                 | 1753 |
| Mus        | -----GECSEGKQ-KSLPEDTFSRFLQLVGVLLLEDIVTKQLKQVDMSEQQHTFY<br>. * . : *::* : : * : : : . . *                               | 1751 |
| Drosophila | CQLTGRFMDALLNVCCRSRHKDALQSVFRLVLAESE---FLCKYYSLLLMSAAGLVGSY-                                                            | 2294 |
| Takifugu   | CQQLGTLMLLIHVFKSGMFRRIITVAASRLLKGESGSGHSGIEFYPLEGLNS--MVHCLI                                                            | 1833 |
| Danio      | CQQLGTLMLLIHIFKSGMFRRIITAAAGKLLKAEGGE---GGDFYTLLEGLNS--LVLQLI                                                           | 1807 |
| Bos        | CQELGTLMLLIHIFKSGTFRRIITAAASRLLR-DG-A---DGGFYGLESINA--WVRSMV                                                            | 1821 |
| Homo       | CQELGTLMLLIHIFKSGMFRRIITAAATRLFRSDG-C---GGSFYTLDSLNL--RARSMI                                                            | 1826 |
| Rattus     | CQELGTLMLLIHIFKSGMFRRIITAAATRLFTSDG-C---EGSFYTLDSLNA--RVRAMV                                                            | 1807 |
| Mus        | CQELGTLMLLIHIFKSGMFRRIITAAATRLFTSDG-C---EGSFYTLLESLNA--RVRSMV<br>** * : : .*::: . : : : : * . : : : * * : : .           | 1805 |
| Drosophila | --LLDAVLLACLRLVLAMRLEEPVALLEQAAQLPLKTNLQ-----                                                                           | 2332 |
| Takifugu   | TTHPSLVLLWCQVLLIIDYTN--YSWWEVHQTPKGHSLSCTKLLSPHSSGEGEEKP-ET                                                             | 1890 |
| Danio      | TTHPSLVLLWCQVLLIINYTN--YTWWSEVHQTPRRHSLSSTKLLSPHSSGEEERPE--G                                                            | 1863 |
| Bos        | PTHPALVLLWCQILLLVSHTD--YRWAAEVQOTPKRRSLSSTKSLSPETSGEDDPDVA                                                              | 1879 |
| Homo       | TTHPALVLLWCQILLLVNHTD--YRWAAEVQOTPKRHSLSSTKLLSPQMSGEEEDSDLAA                                                            | 1884 |
| Rattus     | PTHPALVLLWCQILLLINHTD--HRWAAEVQOTPKRHSLSCTKSLNPQISA-EEDSGSAA                                                            | 1864 |
| Mus        | PTHPALVLLWCQILLLINHTD--HRWAAEVQOTPKRHSLSCTKSLNPQKSGEEEDSGSAA<br>*** * *::: : : . * * . *                                | 1863 |
| Drosophila | --RALLREVCRASA---GCDWSAQVRRLEFGRYLNFLIADHLEFICELCQERPECGSLL                                                             | 2387 |
| Takifugu   | RLAMINREIVRRGALILFCDYVC---QNLHDSEHLTWLIVNHVRDLIDLSHEPPVQDFIS                                                            | 1947 |
| Danio      | KLTMCNREIVRRGALILFCDYVC---QNLHDSEHLTWLIVNHVSDLISLSHEPPVQDLIS                                                            | 1920 |
| Bos        | KLGMCNREIVRRGALILFCDYVC---QNLHDSEHLTWLIVNHIQDLINLSHEPPVQDFIS                                                            | 1936 |
| Homo       | KLGMCNREIVRRGALILFCDYVC---QNLHDSEHLTWLIVNHIQDLISLSHEPPVQDFIS                                                            | 1941 |
| Rattus     | QLGMCNREIVRRGALILFCDYVC---QNLHDSEHLTWLIVNHIQDLISLSHEPPVQDFIS                                                            | 1921 |
| Mus        | QLGMCNREIVRRGALILFCDYVC---QNLHDSEHLTWLIVNHIQDLISLSHEPPVQDFIS<br>** : * . * ** : . : . * . . . * . * : : : : * . * * . : | 1920 |
| Drosophila | QVALFRNAHRLSRQSVRIVLRLLRGLCE---PAERE-----ASGDVGSAD-AD                                                                   | 2430 |
| Takifugu   | AV-----HRNSAAS-GLFIQAIQSRCDNLNSPTMLKKTLOCLEGIHLSQSGSLLMLYVD                                                             | 2000 |
| Danio      | AV-----HRNSAAS-GLFIQAIQSRCDNLCTPVMLKKTLOCLEGIHLSQSGALLMLYVD                                                             | 1973 |
| Bos        | AI-----HRNSAAS-GLFIQAIQSRCDNLSTPTMLKKTLOCLEGIHLSQSGAVLMLYVD                                                             | 1989 |
| Homo       | AV-----HRNSAAS-GLFIQAIQSRCDNLSTPTMLKKTLOCLEGIHLSQSGAVLTYVD                                                              | 1994 |
| Rattus     | AI-----HRNSAAS-GLFIQAIQSRCDNLSTPTMLKKTLOCLEGIHLSQSGAVLTYVD                                                              | 1974 |
| Mus        | AI-----HRNSAAS-GLFIQAIQSRCDNLSTPTMLKKTLOCLEGIHLSQSGAVLTYVD<br>: ** * * : : : : * : * . : ** : . *                       | 1973 |
| Drosophila | PT-IQAMQLLSRLHQLYE-----GERSLQLPPIERMARRLS--AQSGQPARNVI                                                                  | 2475 |
| Takifugu   | KLLSTPFRVLARMVDTLACRRVEMLLAETLQNSVAQLPLEELHRIQEYLQTSGLAQRHQR                                                            | 2060 |
| Danio      | KLLNTPFRVLARMVDTLACRRVEMLLAETLQNSIAQLPLEELDRIQQYLQTSGLAQRHQR                                                            | 2033 |
| Bos        | KLLCTPFRVLARMVDTLACRRVEMLLAANLQSSTAQLPAEELIRIQEHLQSSGLAQRHQR                                                            | 2049 |



|            |                                                                |      |
|------------|----------------------------------------------------------------|------|
| Homo       | RLLCTPFRVLARMVDILACRRVEMLLAANLQSSMAQLPMEELNRIQEYLOSSGLAQRHQR   | 2054 |
| Rattus     | RLLGTPFRALARMVDTLACRRVEMLLAANLQSSMAQLPEEELNRIQEHLQNTGLAQRHQR   | 2034 |
| Mus        | RLLGTPFRALARMVDTLACRRVEMLLAANLQSSMAQLPEEELNRIQEHLQNSGLAQRHQR   | 2033 |
|            | : : * : * : : . * * * * . : * . : * * :                        |      |
| Drosophila | YERLVEG-DLAGGEDQDALRTLKLDLECRQDNETATPSRIIDESWLFAQLIKFATQHAD    | 2534 |
| Takifugu   | FYSLLDRFRATV-SDTSSP-STPVTSHPLDGDPPPAPELVIADKEWYVALVKSQCCLHGD   | 2118 |
| Danio      | FFSLLDRFRATVAEDTTSP-VAPI TTHPLDGDPPPPENVEPNKEWYVTLVKSQCCLRGE   | 2092 |
| Bos        | LYSLLDRRLRATAPGSHGP-TPPVTSHPLDGDGGLALEAVNPKDWYVQLVKAQCWTRSD    | 2108 |
| Homo       | LYSLLDRFRLSTMQDSLSP-SPPVSSHPLDGDGHVSLLETVSPDKDWYVHLVKSQCWTRSD  | 2113 |
| Rattus     | LYSLLDRFRLSTVQDSLSP-LPPVTSHPLDGDGHTSLETVNPDKDWYLQLVRSQCWTRSD   | 2093 |
| Mus        | LYSLLDRFRLSTVQDSLSP-LPPVTSHPLDGDGHTSLETVSPDKDWYLQLVRSQCWTRSD   | 2092 |
|            | * : : : . . : . * : : * . : . : : :                            |      |
| Drosophila | APQQQKQLMLL-----LLEIQSEPKLQRL-----LRSLGTEHEAKLLRHAIAGSL        | 2579 |
| Takifugu   | VSLEETTELLTKLPPADLLSVMSCKEFNLSLLCPCLSLGVQRLLRGQGSLLLETALQVTL   | 2178 |
| Danio      | GALYETTELLTKLPQSDLNAIMTCKDFNLCLLASCLSVGVQRVCKDHGAVLFDTAQQVTF   | 2152 |
| Bos        | SALLEGAELVSRIPAGDLGAFMMHSEFNLSLLAPCLGLGMREISGGQESPLFEAARTATL   | 2168 |
| Homo       | SALLEGAELVNRIPAEDMNAFMMNSEFNLSLLAPCLSLGMSEISGGQKSALFEAAREVTL   | 2173 |
| Rattus     | SALLEGAELVNRIPAEDMSDFMMSSEFNLSLLAPCLSLGMSEIANGQKSPLFEAARRVTL   | 2153 |
| Mus        | SALLEGAELVNRIPAEDMNDFMMSSEFNLSLLAPCLSLGMSEIANGQKSPLFEAARGVIL   | 2152 |
|            | : : : . : : * * : : : : * : * :                                |      |
| Drosophila | AAMMSAFRQKCIQHAPHINYMQPTPLARVSCALLMSRVASTEATKCRNPPTGEQLDVARA   | 2639 |
| Takifugu   | EQLAGATGLL---PVPHHSFIPTS---H---PQSHWK-----                     | 2206 |
| Danio      | ERLAGVIELL---PSPHQPLLPSS---KV-CPDYWQ-----                      | 2181 |
| Bos        | DRVTVVVQQQL---PAVHEAFQPFLL---PTQPSAYWS-----                    | 2198 |
| Homo       | ARVSGTVQQQL---PAVHHVFQPEL-----PAEPAAWS-----                    | 2203 |
| Rattus     | DRVTVVVQQQL---PAVHQVFQPFLL---PTEPTAYWS-----                    | 2183 |
| Mus        | NRVTSVVQQQL---PAVHQVFQPFLL---PIEPTAYWN-----                    | 2182 |
|            | : . * .                                                        |      |
| Drosophila | VGALMACIRNAEQTALIYIDARLME-----KF--VVEHLLRREHLPQ-----           | 2679 |
| Takifugu   | -----QLAEVYGDPGFYSRVLSLCRALSQYLLTVKQLPSSLRIPSDKEHLITT          | 2254 |
| Danio      | -----KLNQVYGEPGFYQTVLSLCGVLSQYLLSLSKLPSSMHIPKDRETLITT          | 2229 |
| Bos        | -----KLDDLFGDAALYR TLTTLAQALAQYLLVFSKLPSHLHLPPEKERD TVK        | 2246 |
| Homo       | -----KLNDLFGDAALYQSLPTLARALAQYLVVVS KLP SHLHLPPEKEK DIVK       | 2251 |
| Rattus     | -----KLNDLFGDTTSYQSLTTLARALAQYLVVLSKVPAPLHLPPEKEGHTVK          | 2231 |
| Mus        | -----KLNDLLGDTTSYQSLTILARALAQYLVVLSKVPAPLHLPPEKEGHTVK          | 2230 |
|            | : : : : : : : : * :                                            |      |
| Drosophila | ----LLAYLGWLAGAAKQILAMPTRQESEQDALGVLLATVNTLLQQPRVWRELNASSDPS   | 2735 |
| Takifugu   | FTCAATEV VVVWHLLQDQL-----PLSVDLQWALSCLCLALQQPCVWNKLS TPEYNT    | 2305 |
| Danio      | FSTLAI EVVVWRLLQDQL-----PLSVDQM SLSCLCLALQQPAVWTHFTSHSYLT      | 2280 |
| Bos        | FMVMTVEALSWHLIHSRV-----PLSLDLQAGLDCCCLALQLPGLWSLLAAPDMVT       | 2297 |
| Homo       | FVVATLEALSWHLIHEQI-----PLSLDLQAGLDCCCLALQLPGLWSVVSSTEFVT       | 2302 |
| Rattus     | FVVM TVEALSWHLIHEQI-----PLSLDLQAGLDCCCLALQVPGLWGVLSSPEYVT      | 2282 |
| Mus        | FVVM TVEALSWHLIHEQI-----PLSLDLQAGLDCCCLALQVPGLWGVLSSPEYVT      | 2281 |
|            | : * : . : * * * * : * . : . :                                  |      |
| Drosophila | LRCELLDLLDSVARCILQ--DTIFYRRHRRDRN-K-----AKGPAPQAI FL----       | 2778 |
| Takifugu   | HTCSLIYCLHHIILAVAVSPGDQLLHPERKKT KALRHSDDDEDQVDSVHDNHTLEWQACEI | 2365 |

Danio HTCSIIHCIQLLIHAVAVGPGDQFLRPERKISEQS-----EDQVDSSD--NOREWHCC EI 2333  
 Bos HACSLIHCVRFILEAIVVQPGDQLLSPERRTSTPKAAR--EDSVSDTQNPQYITAACGM 2355  
 Homo HACSLIYCVHFILEAVAVQPGEQLLSPERRTNTPKAISEEEEEVDPNTQNPKYITAAACEM 2362  
 Rattus HTCSLIHCVRFILEAIAVQPGDQLLGPESRSHTPRAVRKE--EVDSDIQNLSHITSACEM 2340  
 Mus HACSLIHCVRFILEAIAVQPGDQLLGPESRSHTPRAVRKE--EVDSDIQNLSHVTSACEM 2339  
 \* . : : : . : . :

Drosophila -AKLIETQIEIESLASGRVLAVGVEEARLQFAGQDLARFQVALSLVTSIGISLLRTHQFYA 2837  
 Takifugu MAELVEGLQSVLSLGH-----HR-----NTAFPAF--LTPTLRNIIISLRLPLVNS 2410  
 Danio MAELVEGLQTVLTLGH-----HK-----NKNIPAF--LTPTLRNVIIISLARLPLVNS 2378  
 Bos VAEMVECLPSVLALGH-----KR-----NSRTPAF--LTPVLRNIVISLARLPLVNS 2400  
 Homo VAEMVESLQSVLALGH-----KR-----NSGVPAF--LTPLLRNIIISLARLPLVNS 2407  
 Rattus VADMVESLQSVLALGH-----KR-----NSTLPSF--LTAVLKNIVVSLARLPLVNS 2385  
 Mus VADMVESLQSVLALGH-----KR-----NSTLPSF--LTAVLKNIVISLARLPLVNS 2384  
 \* . : : \* : : \* . . \* : : : \* \* . :

Drosophila YAVTPHELIQQPGDQQEQADGKLPISIPVDSLSVDVLRQFVKRLSIFGFTRQQFEFY 2897  
 Takifugu HTRVPPPLVWKLGWSPQGGFEGTTLPEIPVDFLQEKDVFREFLYRINTLGWSNRTOFEET 2470  
 Danio YTRIPPLVWKLGWSPKLSGFEFTALPEIPVEFLQEKDVFREFLYRINTLGWSSRTOFEET 2438  
 Bos YMRVPPPLVWKLGWSPKPGGDFGTVPFEIPVEFLQEKDVFREFIYRINTLGWTSRTOFEET 2460  
 Homo YTRVPPPLVWKLGWSPKPGGDFGTAFPEIPVEFLQEKDVFKEFIYRINTLGWTSRTOFEET 2467  
 Rattus YTRVPPPLVWKLGWSPKPGGDFGTVPFEIPVEFLQEKDVFKEFIYRINTLGWTSRTOFEET 2445  
 Mus YTRVPPPLVWKLGWSPKPGGDFGTVPFEIPVEFLQEKDVFKEFIYRINTLGWTSRTOFEET 2444  
 : \* : : . : : . : \* . \* : : : : \* : \* . : \* : \* \* \* \*

Drosophila FMTCLLLINKL--Y-----DEHMVDQEQEQFQIKQVCLQAILLELLMTYKTFPIVGLANGQF 2950  
 Takifugu WATLLGVLVTQPITMDQEEETQEQEEDLERTQLNVLAVQAITSVLVSAMTLPATAGNPAVSC 2530  
 Danio WATLLGVLVTQPITMDQEEETQEQEEDLERTQINVLAVQAITSVLVSAMTLPATAGNPAVSC 2498  
 Bos WATLLGVLVTQPLMMEQEEES--PPEEDVERTQIHVLAVQAITSVLVSAMTVPVAGNPAVSC 2519  
 Homo WATLLGVLVTQPLVMEQEEES--PPEEDTERTQINVLAVQAITSVLVSAMTVPVAGNPAVSC 2526  
 Rattus WATLLGVLVTQPLVMEQEEES--PPEEDTERTQIHVLAVQAITSVLVSAMAVPVAGNPAVSC 2504  
 Mus WATLLGVLVTQPLVMEQEEES--PPEEDTERTQIHVLAVQAITSVLVSAMTVPVAGNPAVSC 2503  
 : \* \* : : . . : : \* : \* : : : \* \* \* \* . \* : : : . \* . \*

Drosophila HHT-----TRWQRITCDSISLKKLHKVQLLVDAC----- 2979  
 Takifugu LEQQPRNKSLKALETRFGRKLAV--IRGEVEREQALVSKRDNVHTYHPYHAWDPVPSLSA 2589  
 Danio PEQQPRNKILKALDTRFGRKLSV--IRGMVEREQAMVSKRDNIATHFPYQAWDPVPSLSS 2557  
 Bos LEQQPRNKPLKALDTRFGRKLSI--IRGIVEQEIQAMVSRRENAATHHLYQAWDPVPSLAP 2578  
 Homo LEQQPRNKPLKALDTRFGRKLSI--IRGIVEQEIQAMVSKRENIATHHLYQAWDPVPSLSP 2585  
 Rattus LEQQPRNKPLKALDTRFGRKLSM--IRGIVEQEIQEMVSQRENTATHHSHQAWDPVPSLLP 2563  
 Mus LEQQPRNKPLKALDTRFGRKLSM--IRGIVEQEIQEMVSQRENTATHHSHQAWDPVPSLLP 2562  
 . \* : \* . \* : : \* : \*

Drosophila ----NVFYQPNLERQLAYDNVIGTRTFAPNQYDLNFSWAQMEDQAAAGVGVGVGLSGG 3035  
 Takifugu ASPGTLISHKLLQLINTERELGNMDYKLGQVSIHVSVLGNNITPLREE-----EWGE 2642  
 Danio STAGTLISHKLLQLINTEREMGNMDYKLGQVSIHVSVLGNNITPLREE-----EWGE 2610  
 Bos ATTGALISHDKLLQLNPERELGMSYKLGQVSIHVSVLGNSITPLREE-----EWDE 2631  
 Homo ATTGALISHKLLQLNPERELGMSYKLGQVSIHVSVLGNSITPLREE-----EWDE 2638  
 Rattus ATTGALISHDKLLQLNPEREPGNMSYKLGQVSIHVSVLGNNITPLREE-----EWDE 2616  
 Mus ATTGALISHDKLLQLNPEREPGNMSYKLGQVSIHVSVLGNNITPLREE-----EWDE 2615  
 : : : \* \* : : . \* : . \* . : : \* .



```

      : **::: : : . : : * * * : * * * . *      : : *
Drosophila  -----DDPEIIAQQNDKVDILLHCIKSSTRDAAWIYGQVLCQIIRDLVPPNEILTKVIKE 3428
Takifugu    SDPQVPDSESIIVAMERVSVLFDRIRKGLPSEARVVARILPQFLDDFFPPQDIMNKVIGE 3006
Danio       ADPTAPDSESVIVAMERVSVLFDRIRKGFSEARVVARILPQFLDDLFPLQDVMNKVIGE 2979
Bos         PSTAAPDSESVIVAMERVSVLFDRIRKGFPCSEARVVARVLPQFLDDFFPPQDVMNKVIGE 2992
Homo        PNPAAPDSESVIVAMERVSVLFDRIRKGFPCSEARVVARILPQFLDDFFPPQDIMNKVIGE 3000
Rattus      PSPATPDSESVIVAMERVSVLFDRIRKGFPCSEARVVARILPQFLDDFFPPQDVMNKVIGE 2978
Mus         PSPATPDSESVIVAMERVSVLFDRIRKGFPCSEARVVARILPQFLDDFFPPQDVMNKVIGE 2977

```

```

      * * :      : : * . * : . * : . .      * :      : : * * : : * . * : : : : . * * * *

```

```

Drosophila  FLAINHPHCDVIAMIVYQVFRSAIDSSYLQMLQDWLICITLPTFLD-QPEQQGVWGLSVIF 3487
Takifugu    FLSNQQPYPQFMATVVYKVFQTLHATGQSSMVRDWVLLSLSNFTQRTPVAMAMWSLSCFF 3066
Danio       FLSNQQPYPQFMATVVYKVFQTLHATGQSSMVRDWVLLSLSNFTQRTPVAMAMWSLSCFF 3039
Bos         FLSSQQPYPQFMATVVYQVFQTLHGAGQSPMVRDWVMLSLSNFTQRPVAMAMWSLSCFF 3052
Homo        FLSNQQPYPQFMATVVYKVFQTLHSTGQSSMVRDWVMLSLSNFTQRPVAMATWSLSCFF 3060
Rattus      FLSNQQPYPQFMATVVYKVFQTLHSAGQSSMVRDWVMLSLSNFTQRTPVAMAMWSLSCFL 3038
Mus         FLSNQQPYPQFMATVVYKVFQTLHSAGQSSMVRDWVMLSLSNFTQRTPVAMAMWSLSCFL 3037

```

```

** : : * : : : * : * * : * : :      : .      * : * * : : * * . * . * * : :

```

```

Drosophila  LSASINLHLIKLFPVLVIGASNSAAAATTATTATTEAAAPAMARKLGQHEIALFVTA 3547
Takifugu    VSASTSQWISALLPHVISRM-----GSSDVVDVNLFCVLV 3100
Danio       VSASTSQWISALLPHVISRM-----GKSDTVDISLFCVLV 3073
Bos         VSASTSPWVSAILPHVSRM-----GKLEQVDVNLFCVLV 3086
Homo        VSASTSPWVAAILPHVISRM-----GKLEQVDVNLFCVLV 3094
Rattus      VSASTSPWVSAILPHVISRM-----GKLEQVDVNLFCVLV 3072
Mus         VSASTSPWVSAILPHVISRM-----GKLEQVDVNLFCVLV 3071

```

```

: * * * . :      : : * * : . .      .      : : * * .

```

```

Drosophila  AQDFHAKLSGEQ--RQRFREAFGSF-KRSQVYGRMLQCL-----3583
Takifugu    AMDFYRHQIDEELDRRAFQSVEFVVASPGSPYFQLLAQLQSIHQDKSL3148
Danio       AMDFYRHQIDEELDRRAFQSVEFVVASPGSPYQLLCCQLQSIHQDTS3121
Bos         ATDFYRHQIEEELDRRAFQSVEFVVAVPGNPYHRLLAQLRSVQKAAAC3134
Homo        ATDFYRHQIEEELDRRAFQSVEFVVAAPGSPYHRLLTCLRNHVHVTTC3142
Rattus      ATDFYRHQIEEELDRRAFQSVEFVVAAPGSPYHRLLAQLQNVHVTTC3120
Mus         ATDFYRHQIEEELDRRAFQSVEFVVAAPGSPYHRLLAQLQNVHVTTC3119

```

```

* * * : :      * :      * : * : . . : .      . . * : : * * *

```

PLEASE NOTE: Showing colors on large alignments is slow.
